# Supplementary material for: Vaping cannabis among adolescents: prevalence and associations with tobacco use from a cross-sectional study in the USA
Source: PubMed Central journal article supplement — BMJ Open. 2019 Jun 13;9(6):e028535. doi: 10.1136/bmjopen-2018-028535 (PMC6585821; doi:10.1136/bmjopen-2018-028535), 2019-06-13
Supplement: bmjopen-2018-028535supp001.pdf [file bmjopen-2018-028535supp001.pdf]

**Table A. Attrition analysis, n=3133, North Carolina Youth Tobacco Survey, 2017 <sup>a</sup>**

|                                 | Included in final sample,<br>n=2835 (89.5%)<br>n (%) | Not included in final sample,<br>n=298 (10.5%)<br>n (%) | P-value |
|---------------------------------|------------------------------------------------------|---------------------------------------------------------|---------|
| Sex                             |                                                      |                                                         |         |
| Female                          | 1428 (94.1%)                                         | 91 (5.9%)                                               | p<0.001 |
| Male                            | 1407 (85.5%)                                         | 201 (14.5)                                              |         |
| Grade                           |                                                      |                                                         |         |
| 9 <sup>th</sup>                 | 904 (92.8%)                                          | 62 (7.2%)                                               | p=0.15  |
| 10 <sup>th</sup>                | 696 (91.0%)                                          | 67 (9.0%)                                               |         |
| 11 <sup>th</sup>                | 577 (89.9%)                                          | 64 (10.1%)                                              |         |
| 12 <sup>th</sup>                | 658 (87.7%)                                          | 79 (12.4%)                                              |         |
| Race                            |                                                      |                                                         |         |
| Non-Hispanic White              | 1503 (91.8%)                                         | 112 (8.2%)                                              | p=0.006 |
| Non-Hispanic Black              | 650 (89.1%)                                          | 74 (10.9%)                                              |         |
| Hispanic                        | 517 (86.6%)                                          | 77 (13.4%)                                              |         |
| Non-Hispanic other race         | 165 (84.9%)                                          | 23 (15.1%)                                              |         |
| Free or reduced-price lunch     |                                                      |                                                         |         |
| Yes                             | 1362 (88.6%)                                         | 146 (11.4%)                                             | p=0.13  |
| No                              | 1473 (91.1%)                                         | 131 (8.9%)                                              |         |
| Current cigarette use           |                                                      |                                                         |         |
| No                              | 2617 (93.3%)                                         | 167 (6.7%)                                              | p<0.001 |
| Yes                             | 218 (75.5%)                                          | 48 (24.5%)                                              |         |
| Current cigar use               |                                                      |                                                         |         |
| No                              | 2497 (93.1%)                                         | 151 (6.9%)                                              | p<0.001 |
| Yes                             | 338 (80.0%)                                          | 75 (20.0%)                                              |         |
| Current smokeless tobacco use   |                                                      |                                                         |         |
| No                              | 2649 (92.9%)                                         | 188 (7.1%)                                              | p<0.001 |
| Yes                             | 186 (67.0%)                                          | 71 (33.0%)                                              |         |
| Current waterpipe use           |                                                      |                                                         |         |
| No                              | 2722 (93.1%)                                         | 179 (6.9%)                                              | p<0.001 |
| Yes                             | 113 (68.3%)                                          | 35 (31.7%)                                              |         |
| Current tobacco e-cigarette use |                                                      |                                                         |         |
| No                              | 2334 (92.7%)                                         | 156 (7.3%)                                              | p=0.004 |
| Yes                             | 501 (85.9%)                                          | 74 (14.1%)                                              |         |

<sup>a</sup> Percentages provided are row percentages, i.e., the percentage in the cell included in the first column and first row indicates that among females, 94.1% were included in the final sample.
